1  
2  
3  
4  
5  
6  
7  
8  
9  
10  
11  
12  
13  
14  
15  
16  
17  
18  
19  
20  
21  
22  
23  
24  
25

**An equation-free method reveals the ecological interaction networks within complex microbial ecosystems**

Running title: Ecological time-series analysis by SSM

Kenta Suzuki<sup>1</sup>, Katsuhiko Yoshida<sup>1</sup>, Yumiko Nakanishi<sup>2,3</sup> and Shinji Fukuda<sup>2,4</sup>

<sup>1</sup>Biodiversity Conservation Planning Section, Center for Environmental Biology and Ecosystem Studies, National Institute for Environmental Studies, 16-2 Onogawa, Tsukuba, Ibaraki, 305-8506 Japan.

<sup>2</sup>Institute for Advanced Biosciences, Keio University, 246-2 Mizukami, Kakuganji, Tsuruoka, Yamagata 997-0052, Japan

<sup>3</sup>RIKEN Center for Integrative Medical Sciences, 1-7-22 Suehiro-cho, Tsurumi-ku, Yokohama, Kanagawa 230-0045, Japan

<sup>4</sup>PREST, Japan Science and Technology Agency, 4-1-8 Honcho Kawaguchi, Saitama 332-0012, Japan

Corresponding author: Kenta Suzuki

Tel.: +81-029-850-2747

E-mail: [suzuki.kenta@nies.go.jp](mailto:suzuki.kenta@nies.go.jp)

Word count: 7238

26 **Abstract**

27 1. Mapping the network of ecological interactions is key to understanding the  
28 composition, stability, function and dynamics of microbial communities. In recent years  
29 various approaches have been used to reveal microbial interaction networks from  
30 metagenomic sequencing data, such as time-series analysis, machine learning and  
31 statistical techniques. Despite these efforts it is still not possible to capture details of  
32 the ecological interactions behind complex microbial dynamics.

33

34 2. We developed the sparse S-map method (SSM), which generates a sparse interaction  
35 network from a multivariate ecological time-series without presuming any  
36 mathematical formulation for the underlying microbial processes. The advantage of the  
37 SSM over alternative methodologies is that it fully utilizes the observed data using a  
38 framework of empirical dynamic modelling. This makes the SSM robust to non-  
39 equilibrium dynamics and underlying complexity (nonlinearity) in microbial processes.

40

41 3. We showed that an increase in dataset size or a decrease in observational error  
42 improved the accuracy of SSM whereas, the accuracy of a comparative equation-based  
43 method was almost unchanged for both cases and equivalent to the SSM at best.  
44 Hence, the SSM outperformed a comparative equation-based method when datasets  
45 were large and the magnitude of observational errors were small. The results were  
46 robust to the magnitude of process noise and the functional forms of inter-specific  
47 interactions that we tested. We applied the method to a microbiome data of six mice  
48 and found that there were different microbial interaction regimes between young to  
49 middle age (4-40 week-old) and middle to old age (36-72 week-old) mice.

50

51 4. The complexity of microbial relationships impedes detailed equation-based modeling.  
52 Our method provides a powerful alternative framework to infer ecological interaction  
53 networks of microbial communities in various environments and will be improved by  
54 further developments in metagenomics sequencing technologies leading to increased  
55 dataset size and improved accuracy and precision.

56

57

58 **Keywords**

59 Ecological interaction network, Microbiota, Next-generation sequencing data,  
60 Multivariate time-series, Empirical dynamic modeling, Nonlinear dynamics

61

62

## 63 **Introduction**

64 Microbial communities contribute to the evolutionary fitness of other living organisms  
65 by inhabiting their bodies (Mueller and Sachs 2015) and surroundings (Chaparro et al.  
66 2012; Heederik and von Mutius 2012; Panke-Buisse et al. 2015). For example, the gut  
67 microbiota assists host metabolism (Tremaroli and Bäckhed 2012; Sommer and  
68 Bäckhed 2013) and provides defense against pathogens (Kamada et al. 2013). This  
69 understanding has motivated the development of microbial medicinal interventions  
70 that attempt to treat various disorders through the manipulation and control of  
71 microbial communities (Borody and Khoruts 2012). Furthermore, an emergent  
72 property of the microbial community is the potential contribution to environmental  
73 remediation through the degradation of pollutants (Swenson et al. 2000; Iranzo et al.  
74 2001). The composition, stability, function and dynamics of a microbial community  
75 provides the mechanistic basis for these microbial treatments, and closer ties between  
76 these ecosystem properties and ecological interaction networks (interaction webs) have  
77 been revealed (Tylianakis et al. 2010). Hence, an understanding of ecological  
78 interaction networks is crucial for both human health and environmental  
79 sustainability. While it is difficult to study complex microbial interactions using  
80 traditional laboratory cultivation approaches, recent developments in next generation  
81 sequencing technology and high performance computing environments have enabled  
82 various approaches for revealing ecological interaction networks, ranging from time-  
83 series analysis, machine learning and statistical techniques (Faust and Raes 2012;  
84 Bucci and Xavier 2014; Faust et al. 2015; Vacher et al. 2016). However, there are  
85 currently no sufficiently effective methods for capturing details of ecological  
86 interactions within microbial communities, which frequently exhibit complex dynamics  
87 (Caporaso et al. 2011; Dethlefsen and Relman 2011; Pepper and Rosenfeld 2012;  
88 Relman 2012; Ravel et al. 2013; Gerber 2014).

89

90 An ecological interaction network is defined as a directed network that describes  
91 interactions between organisms, such as mutualisms, competition and antagonistic  
92 (predator-prey) interactions (Morin 2011; Faust and Raes 2012). An ecological  
93 interaction network is generally described as a pairwise interaction matrix whose  
94 elements take zero, positive or negative values with regard to the effect of one species  
95 on the other. Here, we summarize the ties between ecological interaction networks and  
96 other ecosystem properties in three main points. First, the stability of an ecological  
97 system relies on its ecological interaction network, as is known from the seminal work

98 of May (1974) that formulated how the stability of an ecological system may depend on  
99 the density and strength of its ecological interactions. In microbial communities in  
100 particular, mutualistic interactions may have a disruptive effect on community  
101 stability (Coyte et al. 2015). Second, there are extensive studies suggesting that an  
102 interaction network is crucial to the development and maintenance of microbial  
103 ecosystem functions (reviewed by Vacher et al. 2016). For example, findings from a type  
104 of artificial selection experiment led Blouin et al. (2015) to suggest that reducing  
105 interaction richness is crucial to developing and maintaining microbial ecosystem  
106 function in terms of low CO<sub>2</sub> emission. Third, an ecological interaction network of a  
107 real ecological system can be used to test the validity of network based metrics for  
108 keystone species, i.e. species having significant effects on the stability and/or function  
109 of ecological systems out of proportion to their abundance (Paine 1969; Power et al.  
110 1996; Jordan 2009). For example, a “keystone index” identifies keystone species based  
111 on their topological position within an interaction network (Jordan 1999), and is a  
112 pioneering theoretical development underpinning recent microbial community studies  
113 (Berry and Widder 2014; Toju 2016).

114  
115 An ecological *interaction* network is different from an ecological *association* network  
116 such as a correlation network (Friedman and Alm 2012) or co-occurrence network  
117 (Faust et al. 2012). Although correlations between time-series data are often used as a  
118 proxy for interactions between species, this is not a reliable method even if a strong  
119 correlation exists between two species (Fisher and Mehta 2014). A co-occurrence  
120 network only implies the presence of underlying ecological interactions, whereas it  
121 provides significant information regarding associations between microbial species  
122 (Vacher et al. 2016). As an alternative approach, algorithms have been developed to  
123 infer ecological interaction networks directly from microbial time-series (Jiang et al.  
124 2013; Fisher and Mehta 2014; Bucci et al. 2016). However, these algorithms may not be  
125 applicable to the complex dynamics of microbial communities, which require the  
126 following algorithm properties. First, a time-series demonstrating non-equilibrium  
127 dynamics must be available because such dynamics are common in microbial  
128 interaction networks. There are many reasons for this, such as species interactions,  
129 environmental fluctuations, experimental perturbations, invasions and aging, and  
130 understanding the dynamics resulting from these processes is clearly an important  
131 goal. Second, a method that can capture microbial relationships without any  
132 presumption regarding their mathematical formulation (in other words, an equation  
133 free modelling approach) is desirable. As claimed for ecological systems in general

134 (Deyle et al. 2016), ecological interactions are often nonlinear, such that the effect of  
135 species X on Y is not simply proportional to the abundance of Y, and attempting to  
136 formulate all these relationships into mathematical functions is not realistic  
137 (DeAngelis and Yurek 2015; Bashan et al. 2016). This fact will reduce the reliability of  
138 approaches that assume *a priori* any underlying equation. Overcoming these obstacles  
139 will widen the applicability of network inference methods without reducing reliability,  
140 and will increase our understanding of microbial communities.

141

142 We developed an algorithm, the Sparse S-Map method (SSM; Fig 1, Materials and  
143 Methods), that satisfies the above requirements. This algorithm generates a sparse  
144 interaction network based on the predictability of an ecological time-series without  
145 assuming any particular underlying equation. Using simulated multispecies population  
146 dynamics, we compared the performance of the SSM to a comparable equation-based  
147 method (LIMITS; Fisher and Mehta 2014) for different dataset sizes, magnitudes of  
148 process noise and observational errors, and functional forms of species interactions to  
149 highlight the differences between equation-free and equation-based methods. We then  
150 applied the SSM to a time-series of gut-microbiota taken from the faeces of six mice  
151 over 72 weeks. To harness data limitations (18 time points per mouse), we pooled data  
152 from five mice for the predication dataset and used it to infer a network that best  
153 explained the dynamics of the remaining mouse.

154

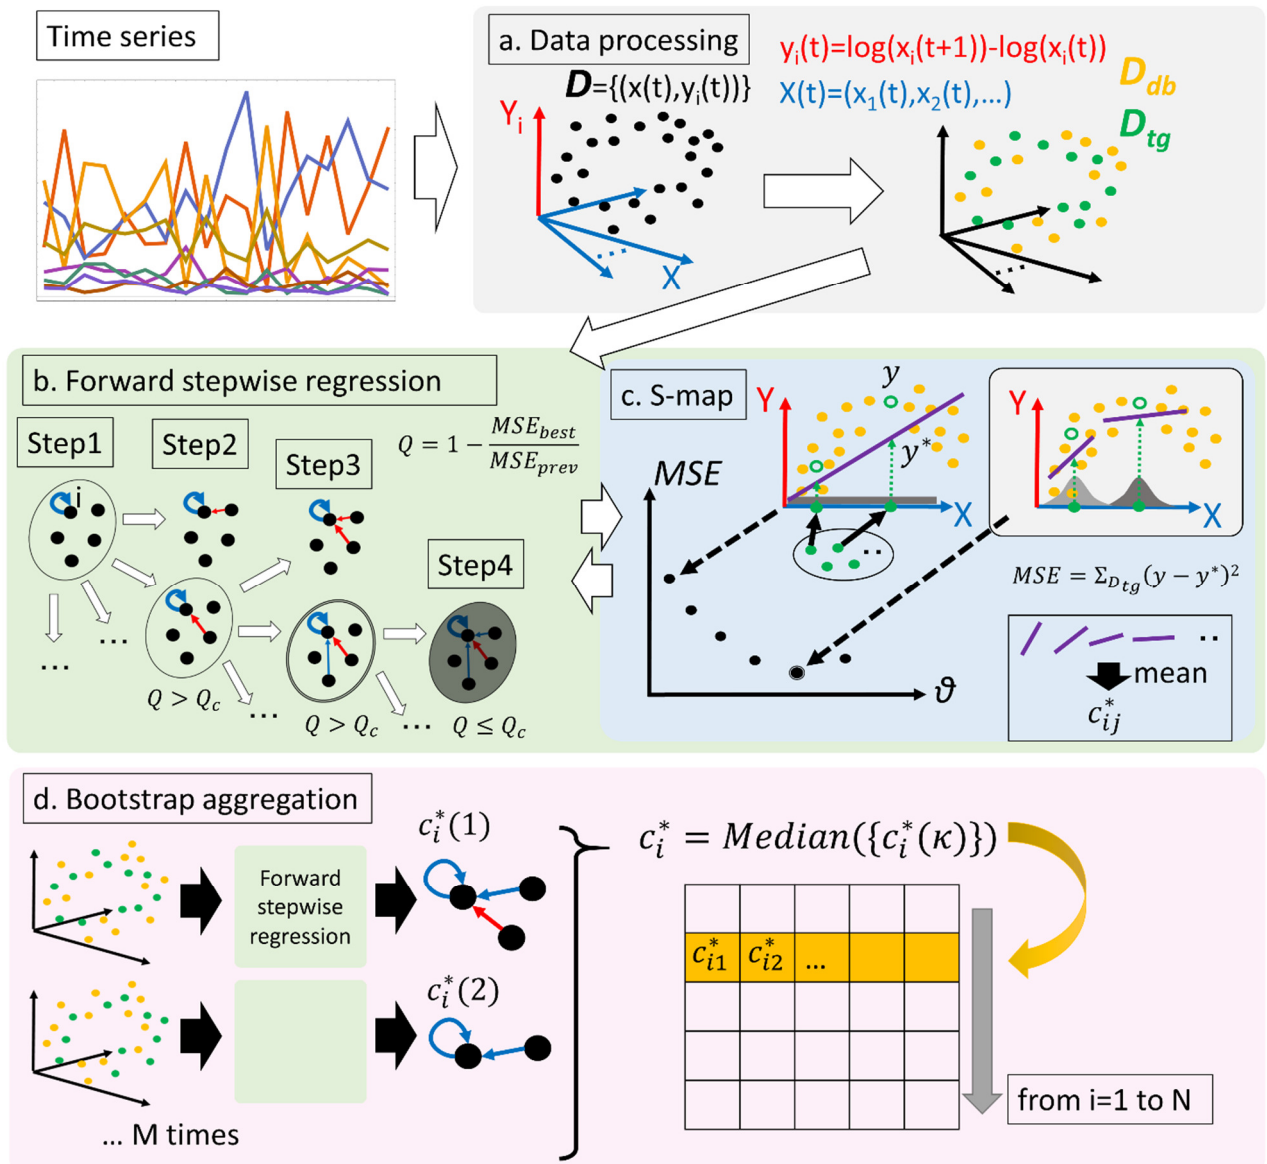

155

156 Figure 1. Overview of the sparse S-map method (SSM).

157

158

## 159 Materials and Methods

160

### 161 Sparse S-map method

162

#### 163 Over view of the Sparse S-map method

164 The sparse S-map method (SSM) is an algorithm that executes a forward stepwise

165 regression scheme with bootstrap aggregation (“bagging”) to calibrate species’

166 interaction topology (i.e. with which species a focal species interacts) for S-map (Dixon

167 et al. 1999, Sugihara et al. 1996, Sugihara 1994). In other words, the SSM is a data-  
168 oriented equation-free modelling approach (Empirical Dynamic Modelling, EDM; Deyle  
169 et al. 2013; Ye et al. 2015; Deyle et al. 2016; Ye and Sugihara 2016) for multispecies  
170 ecological dynamics whose interaction topology is unknown. The SSM is essentially a  
171 non-parametric method that does not require any additional effort to adjust  
172 parameters for the given data. Furthermore, owing to the forward stepwise scheme, it  
173 is applicable to both absolute and relative abundance data without special treatment  
174 (Fisher and Mehta 2014). Fisher and Mehta (2014) have already applied the forward  
175 stepwise scheme with bagging to a linear regression model and thus developed an  
176 algorithm inferring the sparse interaction matrix (LIMITS). However, because of the  
177 use of a linear regression model, the authors limited the applicability of LIMITS to  
178 systems whose dynamics are close to equilibrium.

179  
180 The SSM is concisely explained as follows. First, in the data processing process, time-  
181 series data is processed to a set of pairs of multivariate explanatory variables and a  
182 response variable ( $D$ ; Fig. 1a). Also in this step, these pairs are separated into  $D_{db}$  and  
183  $D_{tg}$ , a training set and a testing set. Second, in a forward stepwise procedure,  
184 explanatory variables used for the regression are added (Fig. 1b). In this step, S-map is  
185 used as the regression method (Fig. 1c). At the end of the forward regression procedure,  
186 interaction strengths are obtained as the mean of coefficients from the regression  
187 function. Then, in the bootstrap aggregation procedure, the first and second procedures  
188 are repeated with randomly generated  $D_{db}$  and  $D_{tg}$ , and the median of the  
189 interactions strengths are taken as the final result (Fig. 1d).

190

### 191 *Data processing*

192 We assume that time-series  $X = \{x(t)\}_{t=1}^L$  is an array of vectors  $x(t) = \{x_i(t)\}_{i=1}^N$  where  
193  $t = 1, \dots, L$  indicates data points with a constant interval (say 1 day),  $i = 1, \dots, N$   
194 indicates species (OTUs) and  $x_i(t) = x_i^*(t) - 1/L \sum_t x_i^*(t)$  is the abundance of species  
195 adjusted to a mean of zero, where  $x_i^*(t)$  is the abundance. If  $x_i^*(t)$  is the relative  
196 abundance, then  $\sum_i x_i(t) = 0$ . However, we do not specify whether  $x_i(t)$  is relative  
197 abundance or absolute abundance because our method is applicable to both cases. For  
198 convenience, we assume that  $X_i = \{x_i(t)\}_{t=1}^L$  is the time series of species  $i$ . We also  
199 define a time series  $Y = \{y_i(t)\}_{t=1}^{L-1}$ , with  $y_i(t) = \log x_i^*(t+1) - \log x_i^*(t)$ , to apply gradient  
200 matching (Ellner et al. 2002), which assumes  $y_i(t)$  as the response variable and  $x(t)$   
201 as the explanatory variable. In the regression processes, the explanatory variables and  
202 the response variable having the same time index is treated as a pair  $(x(t), y_i(t))$ . We



203 refer to the set of these pairs  $D = \{(x(t), y_i(t))\}_{t=1}^{L-1}$  as “data”. Please note that while  
204  $y_i(t)$  is a scalar,  $x(t)$  is a vector with  $N$  elements.

205

### 206 *Bootstrap aggregation*

207 Because the forward stepwise regression explained below is known to be unstable, we  
208 used a bootstrap aggregation method to obtain a stable result. To apply the bagging  
209 procedure, half of the pairs in  $D$  are randomly sampled to make a “database”  $D_{db}$  and  
210 the rest of the points are a “target”  $D_{tg}$ . We use  $Y^{tg} = \{y_i^{tg}(t)\}$ ,  $X^{tg} = \{x^{tg}(t)\}$  and  
211  $x^{tg}(t) = \{x_i^{tg}(t)\}$  when we need to specifically indicate the points in  $D_{tg}$ . The process of  
212 forward stepwise regression is repeated  $Z$  times with different partitioning. Here, we  
213 set  $Z = 100$ .

214

### 215 *S-map*

216 S-map is a locally weighted linear regression model used for the mechanistic prediction  
217 of complex ecological dynamics (Deyle et al. 2016). S-maps approximate the best local  
218 linear model by giving greater weight to points that are close to the current ecosystem  
219 state (Fig. S1a). It is applicable to complex ecological dynamics without any limitation  
220 in the dynamic property of given data and requires no special effort in formulating the  
221 underlying species relationships into mathematical functions. However, so far it has  
222 only been applicable to ecological systems with a small number of species whose  
223 interaction topology is already known. By applying a forward stepwise regression with  
224 bootstrap aggregation, the SSM realizes the appropriate selection of the interaction  
225 topology for S-map so that S-map becomes most relevant for explaining a given set of  
226 data points. Hence, in the SSM, S-map is applied to a subset of variables (e.g., Fig S1b)  
227 in a stepwise manner. The ability of S-map to describe non-linear species relationships  
228 makes the selection of interacting species reliable.

229

230

### 231 Algorithm 1: S-map

- 232 1. Initiate  $\theta = 0$ .
- 233 2. Select a pair  $(x^{tg}(s), y_i^{tg}(s))$  from  $D_{tg}$ .
- 234 3. Calculate weight vector by,

$$235 \quad w_s = \left\{ \exp \left( - \frac{\theta \|x^{tg}(s), x(k)\|}{d_s} \right) \right\}_{x(k) \in D_{db}},$$

236 where,



237

$$d_s = \frac{1}{n} \sum_{x(k) \in D_{db}} \|x_s^{tg}, x_k\|.$$

238

Here,  $\|\cdot\|$  denotes the Euclidian distance between two vectors and  $n = |D_{db}|$  is the

239

number of elements in  $D_{db}$ .

240

4. Generate a weighted design matrix as,

241

$$A_s = \{w_{sk}x_k\}_{k=1}^n,$$

242

where  $w_{sk}$  is the  $k$ th element of  $w_s$ . Here, 1 is added as the  $N + 1$ th element of  $x_k$  to

243

include the constant term for regression.

244

Similarly, generate a vector of weighted response variable as,

245

$$B_s = \{w_{sk}y_i(k)\}_{k=1}^n.$$

246

5. Solve a linear equation

247

$$B_s = A_s C_s.$$

248

as,

249

$$C_s = A_s^{-1} B_s.$$

250

Here,  $A_s^{-1}$  is the pseudoinverse of  $A_s$ .

251

6. Prediction for  $y_i^{tg}(s)$  is obtained as,

252

$$y_i^*(s) = C_s x(s).$$

253

Here again 1 is included as the  $N + 1$ th element of  $x(s)$ .

254

7. Iterate 2-6 until all pairs in  $D_{tg}$  is selected. Then, calculate

255

$$MSE_{new} = \frac{\sum_{\bar{y}_i(s) \in D_{tg}} |y_i^*(s) - y_i^{tg}(s)|}{|D_{tg}|}.$$

256

8. If  $\theta = 0$ , or  $\theta \neq 0$  and  $MSE_{new} < MSE$  increment  $\theta$  by  $d\theta$ , set  $MSE = MSE_{new}$  and

257

back to 2, else return  $MSE$ .

258

259

The  $i$ th column of the inferred interaction matrix,  $c_i^* = \{c_{ij}^*\}_{j=1}^N$  is obtained by simply

260

assuming that

261

$$\tilde{c} = \frac{1}{n} \sum_{k=1}^n C_k,$$

262

and set  $c_{ij}^* = \tilde{c}(j)$  for  $j \in I_{active}$  and  $c_{ij}^* = 0$  otherwise. Here,  $\tilde{c}(j)$  represents the

263

element of  $\tilde{c}$  corresponding to the  $j$ th species in  $I_{active}$ . As explained in the next

264

section,  $I_{active}$  is the set of the index of species whose interaction to species  $i$  is active

265

(thus, non-zero).

266

267

The parameter  $\theta$  tunes how strongly the regression is localized to the region of state

268

space around each  $x_s^{tg}$ . Note that if  $\theta = 0$ , the S-map model reduces to a vector auto-

269 regression (VAR) model. Thus, S-maps include linear VAR models as a special case.  
270 More importantly, this also means that the SSM includes LIMITS as a special case. For  
271  $\theta > 0$ , the elements of  $w_s$  can vary with the location in the state space in which  $(x, y_i)$   
272 is plotted, and with increasing  $\theta$  they can vary more strongly for different  $x^{tg}$ . If  $\theta$  is  
273 too small, the coefficients will underestimate the true variability in interaction  
274 strength. However, with larger  $\theta$  the regression hinges on only the most proximal  
275 points on the manifold and will therefore be more sensitive to observation error. Here,  
276 we selected  $\theta$  that minimizes *MSE* by incrementing  $\theta$  from zero by  $d\theta = 0.2$  steps  
277 because as a function of  $\theta$ , *MSE* generally has a global minimum not very distant from  
278 zero (say,  $\theta < 10$ ). It is the simplest procedure for the minimization of *MSE* adopted for  
279 explanation, and would be replaced by a more sophisticated method. For instance, an  
280 algorithm that initially searches for the best  $\theta$  in a broad range with a low resolution  
281 (e.g.,  $\theta = \{0, 1, \dots, 8\}$ ) and then increases the resolution with a stepwise narrowing of the  
282 search range may work as well.  $\theta$  is used as an indicator for the degree of non-  
283 linearity of dynamics (Sugihara 1994; Sugihara et al. 1996). Here, we also used  $\theta$  as a  
284 proxy for non-equilibrium of time-series data (see supplement information).

285

### 286 *Forward stepwise regression*

287 The use of forward stepwise regression was motivated by two reasons (Fisher and  
288 Mehta 2014). The first reason is that the forward stepwise selection can distinguish  
289 between the presence and absence of species interactions and include interactions only  
290 when it improves the predictive power of the model. This makes inferred interaction  
291 networks sparse and easily interpretable. The second reason is that modern  
292 metagenomic techniques can only measure the relative abundances of microbes, not  
293 their absolute abundances. Hence, the design matrix for the linear regression becomes  
294 singular, and there exists no unique solution to the ordinary least squares problem. In  
295 the forward stepwise procedure interactions and species are added sequentially to the  
296 regression as long as they improve the predictive power of the model. Because the  
297 design matrix now only contains a sub-set of all possible species, it is never singular  
298 and the linear regression problem is well-defined. Below, we describe the forward  
299 stepwise regression including bootstrap aggregation. Since all of the regressions are  
300 performed independently for each species, we described the algorithm for a species, i.e.  
301 inferring a row of the interaction matrix ( $c_i^*$ ). The full interaction matrix is obtained by  
302 repeating the procedure from  $i = 1$  to  $N$ .

303

304 

|                                                                     |
|---------------------------------------------------------------------|
| Algorithm 2: Forward stepwise regression with bootstrap aggregation |
|---------------------------------------------------------------------|

- 305 1. Set the target species  $i$ .  
 306 2. Initiate index  $z = 1$ .  
 307 3. Sample half of the pairs in  $D$  to make  $D_{db}$ , and set the rest as  $D_{tg}$ .  
 308 4. The set of the index of explanatory variables (species) that have active interactions  
 309 to species  $i$  is initialized to  $I_{active} = \{i\}$  because the presence of intra-specific  
 310 interaction is natural, and the interaction with the rest of the species is unified as  
 311  $I_{inactive} = \{j\}_{j \neq i}$ .  
 312 5. A regression for  $y_i$  by  $\{x_k\}_{k \in I_{active}}$  is performed by S-map. This returns  $MSE_{prev}$ .  
 313 6. For each index  $j$  in  $I_{inactive}$ , create  $I_{test}^{(h)} = I_{active} \cup \{j\}$ , where the suffix  $h$  indicates  
 314 that  $j$  is the  $h$ th element of  $I_{inactive}$ .  
 315 7. Perform a regression  $y_i$  by  $\{x_l\}_{l \in I_{test}^{(h)}}$  by S-map.  
 316 8. Repeat 7 to obtain  $MSE^{(h)}$  for all  $h$ .  
 317 9. Set the least  $MSE^{(h)}$  as  $MSE_{best}$  and  $I_{test}^{(h)}$  as  $I_{best}$ .  
 318 10. If  $Q = 1 - MSE_{prev}/MSE_{best}$  is greater than a pre-specified value ( $Q_c$ ) then set  
 319  $MSE_{best}$  as  $MSE_{prev}$  and  $I_{best}$  as  $I_{active}$ , remove  $h$ th element of  $I_{inactive}$  and go back to  
 320 6, otherwise go to 11.  
 321 11. Return  $c_i^*(z)$  where  $z$  indicates that the inferred interaction strength for species  $i$   
 322 is obtained by the  $z$ th iteration. If  $z < Z$  increment  $z$  by 1 and go back to 3, otherwise  
 323 terminate the loop.  
 324 12. Return  $c_i^* = \text{Median}(\{c_i^*(z)\}_{z=1}^Z)$ .

325  
 326  $Q_c$  controls the sensitivity of the algorithm to find links between species. It is  
 327 reasonable to fix  $Q_c$  as zero to include a new link when it improves predictability of  
 328  $y_i$ s. However, very small improvement of  $Q_c$  would result in inclusion of erroneous  
 329 links. For this reason, we set  $Q_c$  as 0.01 in both the SSM and LIMITS.

### 331 ***Simulation model***

332 We used a population dynamics model to generate the data set for validation. The  
 333 model is based on a generalized Lotka-Volterra equation (GLVE),

$$334 \quad \frac{dx_i}{dt} = x_i \{G(x) + \sum_{j=1}^N F_i(x_j)\},$$

335 (1)

336 which has been frequently used to model microbial population dynamics (Fisher and  
 337 Mehta 2014; Coyte et al. 2015; Bucci et al. 2016). We assumed that  $G(x) = r_i(1 -$

338  $\sum_{i=1}^N x_i/K)$ , where  $r_i$  is the intrinsic growth rate and  $K$  is the carrying capacity that

339 defines upper limit of abundance. For  $F_i$ , to show that our approach actually is  
340 equation-independent, we tested three different forms,  $F_i(x_j) = a_1 c_{ij} x_j / K$ ,  $a_2 c_{ij} x_j / (\beta K +$   
341  $x_j)$  and  $a_3 c_{ij} x_j^2 / (\beta K^2 + x_j^2)$ , known as Holling type I, II and III functional response,  
342 respectively (see supplementary information). In  $F_i$ ,  $c_{ij}$  controls the per capita effect of  
343 species  $j$  on  $i$ . Hence, the matrix  $C = \{c_{ij}\}$  represents the presence or absence of  
344 interaction between species.  $\beta$  is the half-saturation constant of the interspecific  
345 interaction.

346

347 To reduce dimensionality of the right hand side of equation (1), we used the  
348 relationship,

$$349 \quad \frac{1}{x} \frac{dx}{dt} = \frac{d \log x}{dt}.$$

350 Hence eq. (1) is transformed to,

$$351 \quad \frac{d \log x_i}{dt} = G(x) + \sum_{j=1}^N F_i(x_j).$$

352 (2)

353 Then, with a noise term, eq. (2) is discretized as,

$$354 \quad y_i(t) = \log x_i(t + \Delta t) - \log x_i(t) = \{G(x) + \sum_{j=1}^N F_i(x_j)\} \Delta t + \eta_i(t)$$

355 (3)

356 This equation gives the true relationship between  $x$ 's and  $y_i$  when applying the  
357 regression test. Here,  $\eta_i(t)$  is a random vector whose elements are drawn from a  
358 normal distribution with mean 0 and standard deviation  $\sigma \sqrt{\Delta t}$ . We used three different  
359 values (0.01, 0.1, 0.2) for  $\sigma$  to test the effect of the different strength of stochasticity.  
360 Moreover, to simulate observational errors, each abundance  $x_i^*(t)$  was perturbed by a  
361 random value drawn from a normal distribution with mean zero and standard  
362 deviation  $\sqrt{\zeta x_i^*(t)}$ . Here, we used four different values (0,1,4,16) for  $\zeta$ .

363

364 Please note that due to (3), the inferred interaction strength  $c_{ij}^*$  corresponds to the  
365 time average of  $F_i(x_j)/x_j$  instead of  $c_{ij}$  itself. However, we later confirm that there is a  
366 strong correlation between  $c_{ij}^*$  and  $c_{ij}$  as a whole. We emphasize that although we  
367 specify  $G$  and  $F$  here, the SSM does not require  $F$  and  $G$  to be known or even  
368 described as a specific mathematical formulation. Please see supplementary  
369 information for the details of the data generation procedure.

370

371

372 ***Application of the SSM to mouse microbiome data***

373 We applied the SSM to the time-series data of gut-microbiota taken from the faeces of  
374 six male C57BL/6J mice ( $M_1$  to  $M_6$ ) which were maintained in a vinyl isolator over a 72  
375 week period (Nakanishi Y. et. al, unpublished data). Faeces were sampled once every 4  
376 weeks between 4 to 72 weeks of age, thus 18 data points were obtained per mouse. In  
377 the mouse gut microbiome data we used, OTUs were categorized into genus-level  
378 groups by the CLASSIFIER program of the Ribosomal Database Project (RDP) within a  
379 software package Quantitative Insights into Microbial Ecology (QIIME). For our  
380 analysis, we picked the seven most abundant groups that comprise approximately 85%  
381 of the total microbial biomass and classified the abundance of the remaining groups  
382 into a single group of “Others”. Next, we calculated  $(x, y_i)$  for all mice and selected the  
383 dataset of a mouse ( $M_k$ ) as  $D_{tg}$ . At each iteration of the bagging procedure, half of the  
384 dataset points of the remaining five mice were randomly sampled as  $D_{db}$ . The above  
385 procedure was repeated for  $k=1$  to 6.

386

### 387 *Performance criteria*

388 Two major performance criteria for network inference methods are sensitivity (the ratio  
389 of detected interacting species pairs with respect to all interacting pairs) and specificity  
390 (the ratio of detected non-interacting species pairs with respect to all non-interacting  
391 pairs; Fig. S2). Furthermore, accuracy (the ratio of detected interacting species pairs  
392 plus that of the non-interacting species pairs with respect to all possible species pairs)  
393 quantifies the overall performance of the method for discriminating interacting and  
394 non-interacting pairs. These are binary classifications that indicate only the  
395 correctness of identifying absence or presence of interaction. We confirmed that these  
396 were sufficient because there was a strong correlation between inferred and actual  
397 interaction strength.

398

### 399 **Results**

400 We compared the performance of the SSM and a comparative equation-based method  
401 (LIMITS) in a five-species coupled food chain model (Fig. 2a, b). The model was  
402 introduced by Deyle et al. (2016) to show the ability of S-map to forecast complex  
403 population dynamics. In their study, however, the interaction topology was assumed to  
404 be known. Our results showed that even without prior knowledge of the interaction  
405 topology, the SSM was able to recover the actual topology from time-series data if the  
406 dataset was large enough. Figure 2c shows that the accuracy of SSM outperformed that  
407 of LIMITS when the dataset was larger than 50 points. The increase in dataset size  
408 improved sensitivity of both methods (Fig. 2d), while it reduced the specificity of LIMITS

409 (Fig. 2e). Hence, the SSM was better at avoiding false positives.  
 410

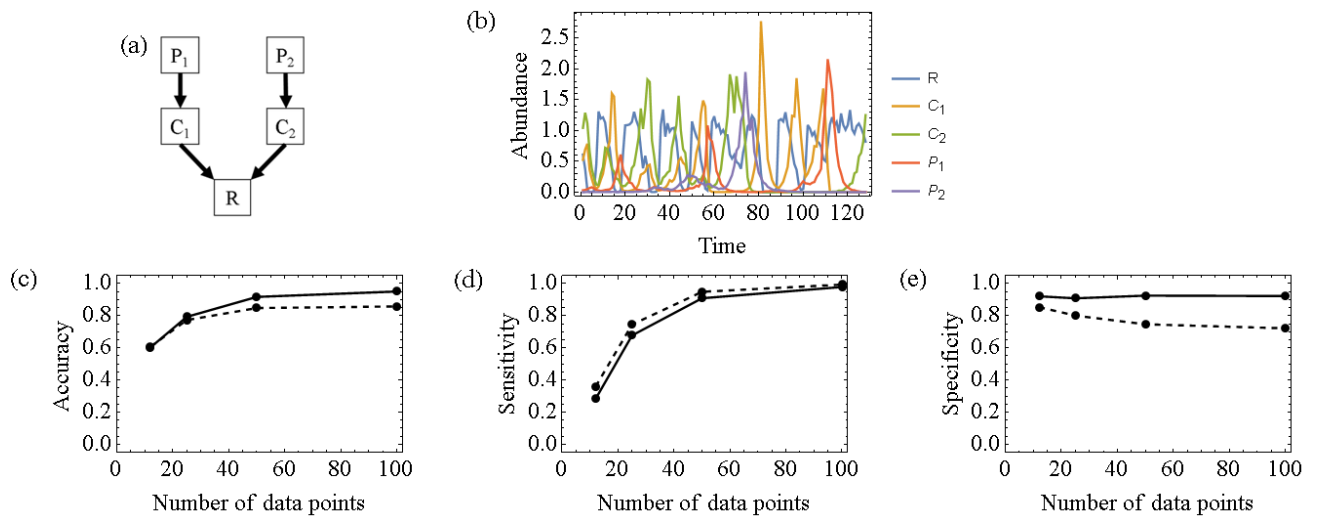

411  
 412 Figure 2. Results of a five species coupled food chain model. Interaction topology of the  
 413 model (a) and population dynamics (b). Accuracy (c), sensitivity (d) and specificity (e) of  
 414 the SSM (solid) and LIMITS (dashed) as a function of the number of data points was  
 415 calculated by assembling 100 different trials. Please see supplementary information for  
 416 the details of the five species model and simulation.

417  
 418  
 419 To compare the SSM and LIMITS further, we tested their performance for complex  
 420 ecological dynamics generated from a generalized Lotka-Volterra model with seven  
 421 species with random interactions. A significant positive correlation ( $p < 0.001$ ) between  
 422 inferred interaction strength ( $c_{ij}^*$ ) and that of the actual network ( $c_{ij}$ ) was found in both  
 423 the SSM and LIMITS, although the SSM showed a stronger correlation than LIMITS  
 424 (Fig. 3). Figure 4 shows that increased dataset size improved the accuracy of the SSM,  
 425 while that of LIMITS remained almost constant. These results were robust for the  
 426 different types of functional responses. The performance of the SSM was equivalent to  
 427 that of LIMITS even in the worst case. Interestingly, the increase in the magnitude of  
 428 process noise improved accuracy both in the SSM and LIMITS when the inter-specific  
 429 interaction was a type II or III functional response, while it reduced accuracy both in  
 430 the SSM and LIMITS when the inter-specific interaction was a type I functional  
 431 response. Next, we tested the effect of observational errors by setting the process noise  
 432 as  $\sigma = 0.2$  (Fig. 5). An increase in dataset size improved accuracy only in the SSM, as  
 433 shown in figure 4. Similarly, a decrease in the magnitude of observational errors  
 434 improved the accuracy of the SSM, while that of LIMITS remained almost constant

435 over all cases. Here again, the performance of the SSM was equivalent to LIMITS even  
 436 in the worst case. In all cases above, the SSM had greater specificity than SLR, which  
 437 compensated for its lower sensitivity (Fig. S3-6).  
 438  
 439

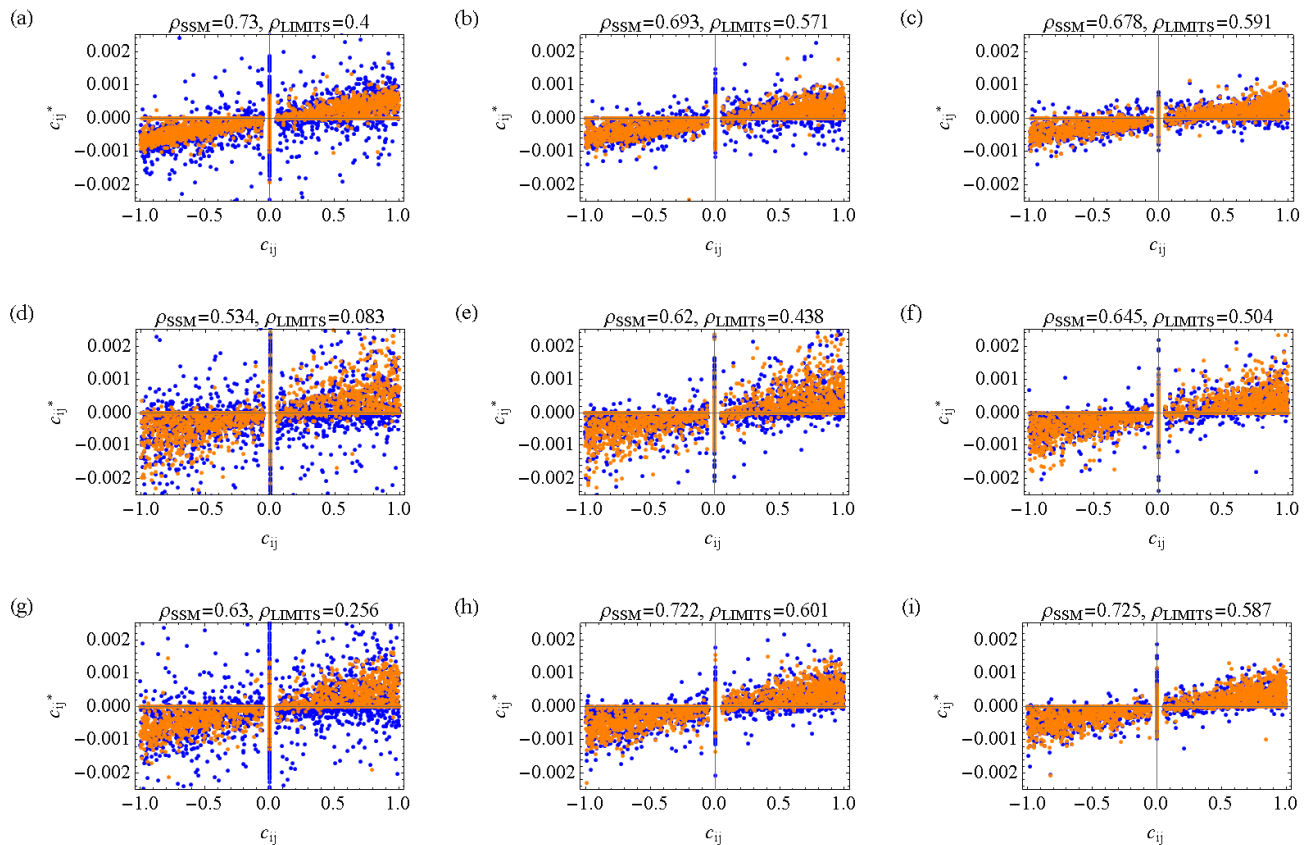

440  
 441 Figure 3. Scatter plot of  $c_{ij}^*$  and  $c_{ij}$ , and correlation measured by Pearson's correlation  
 442 coefficient (orange: SSM, blue: LIMITS). (a-c) Holling type I functional response, (d-f)  
 443 Holling type II functional response, and (g-i) Holling type III functional response with  
 444 process noise 0.01, 0.1 and 0.2. Points were assembled from 100 network inference  
 445 results calculated from 100 different time-series data with 100 dataset points  
 446 generated from a seven species GLV model with random species interactions,  $\sigma = 0.01$   
 447 and  $\zeta = 0$ .  
 448



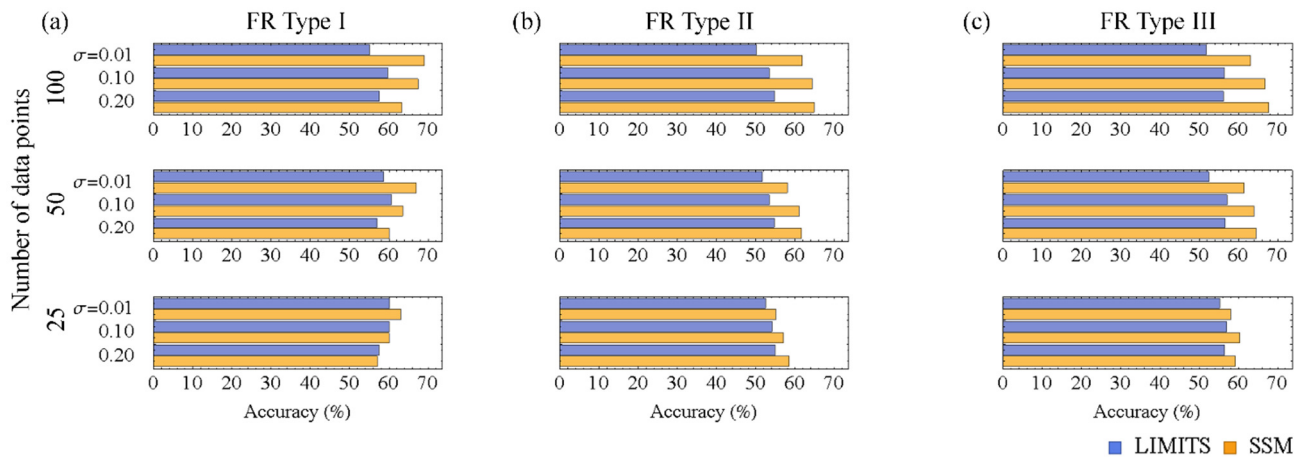

449

450 Figure 4. Accuracy of the SSM and LIMITS for the inter-specific interactions of  
 451 simulated ecological dynamics with Holling type I (a), II (b) and III (c) functional  
 452 response calculated by assembling 100 different network inference results (calculated  
 453 from 100 different time-series data with 100, 50 and 25 dataset points generated from a  
 454 seven species GLV model with random species interactions and different magnitudes of  
 455 process noise,  $\zeta = 0$ ).

456

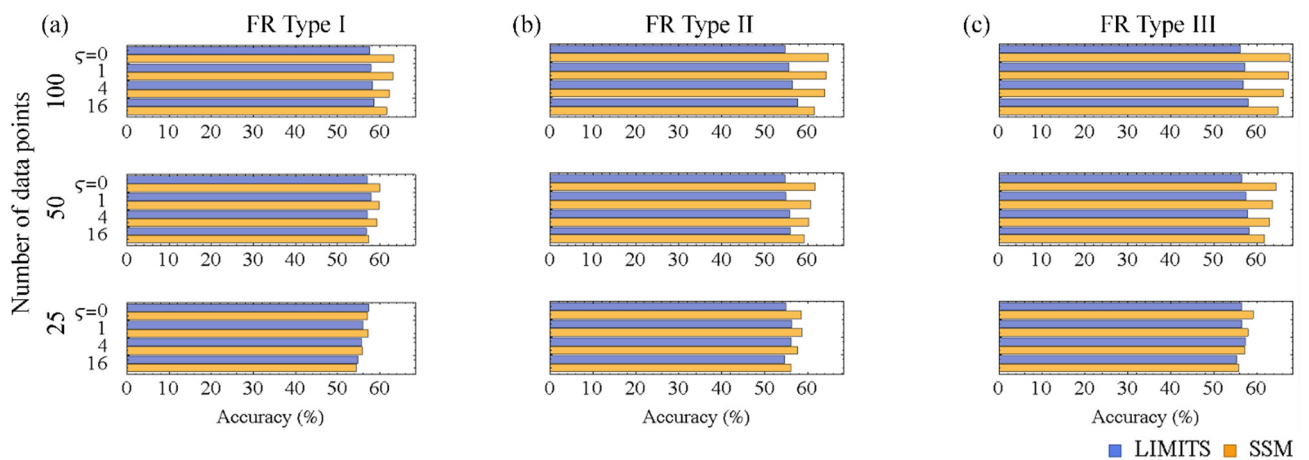

457

458 Figure 5. Accuracy of the SSM and LIMITS for the inter-specific interactions of  
 459 simulated ecological dynamics with Holling type I (a), II (b) and III (c) functional  
 460 responses calculated by assembling 100 different network inference results (calculated  
 461 from 100 different time-series with 100, 50 and 25 dataset points generated from a  
 462 seven species GLV model with random species interactions and  $\sigma = 0.2$  perturbed by  
 463 different magnitudes of observational errors).

464

465

466 The ecological interaction networks of mouse gut microbiota were inferred using the

467 complete dataset from weeks 4-72 as well as comparing weeks 4-40 and weeks 36-72 to  
468 consider the shift in community composition around the middle of the mouse's aging  
469 processes (Langille et al. 2014; Nakanishi Y. et al, unpublished data). The number of  
470 possible links identified by the SSM was 40 for time-series data from weeks 4-72, 19 for  
471 weeks 4-40 and 16 for weeks 36-72 ,including overlap among different mice. The  
472 number of identified links in weeks 4-40 and weeks 36-72 week was expected to be  
473 smaller than that of weeks 4-72 due to the reduced number of data points. In the  
474 network inferred by the data points at 4-72 weeks of age (Fig. 6a), unclassified  
475 Rikenellaceae, Ruminococcaceae and Clostridiales had more interaction links than  
476 others in this order. These groups varied according to in-degree (effect from other  
477 species) and out-degree (effect on other species). The in-degree exceeded out-degree for  
478 Rikenellaceae, out-degree was zero while in-degree was 12 for Clostridiales, and both  
479 in-degree and out-degree were the same for Ruminococcaceae. The number of positive  
480 and negative links was mostly the same in the three species for both in- and out-degree  
481 except for Rikenellaceae with 12 negative and 2 positive effects on other species. The  
482 comparison of networks inferred by data points at 4-40 weeks of age (Fig. 6b) and 36-72  
483 weeks of age (Fig. 6c) showed that links with Ruminococcaceae were most common in  
484 weeks 4-40 while links with Rikenellaceae were most common in weeks 36-72.  
485 Clostridiales had positive effects from Ruminococcaceae in weeks 4-40 and negative  
486 effect from Rikenellaceae in weeks 36-72. Hence, most of the links with Clostridiales  
487 were explained by links from these two species. *Allobaculum* was also a major  
488 counterpart of Ruminococcaceae at 4-40 weeks of age.  
489  
490

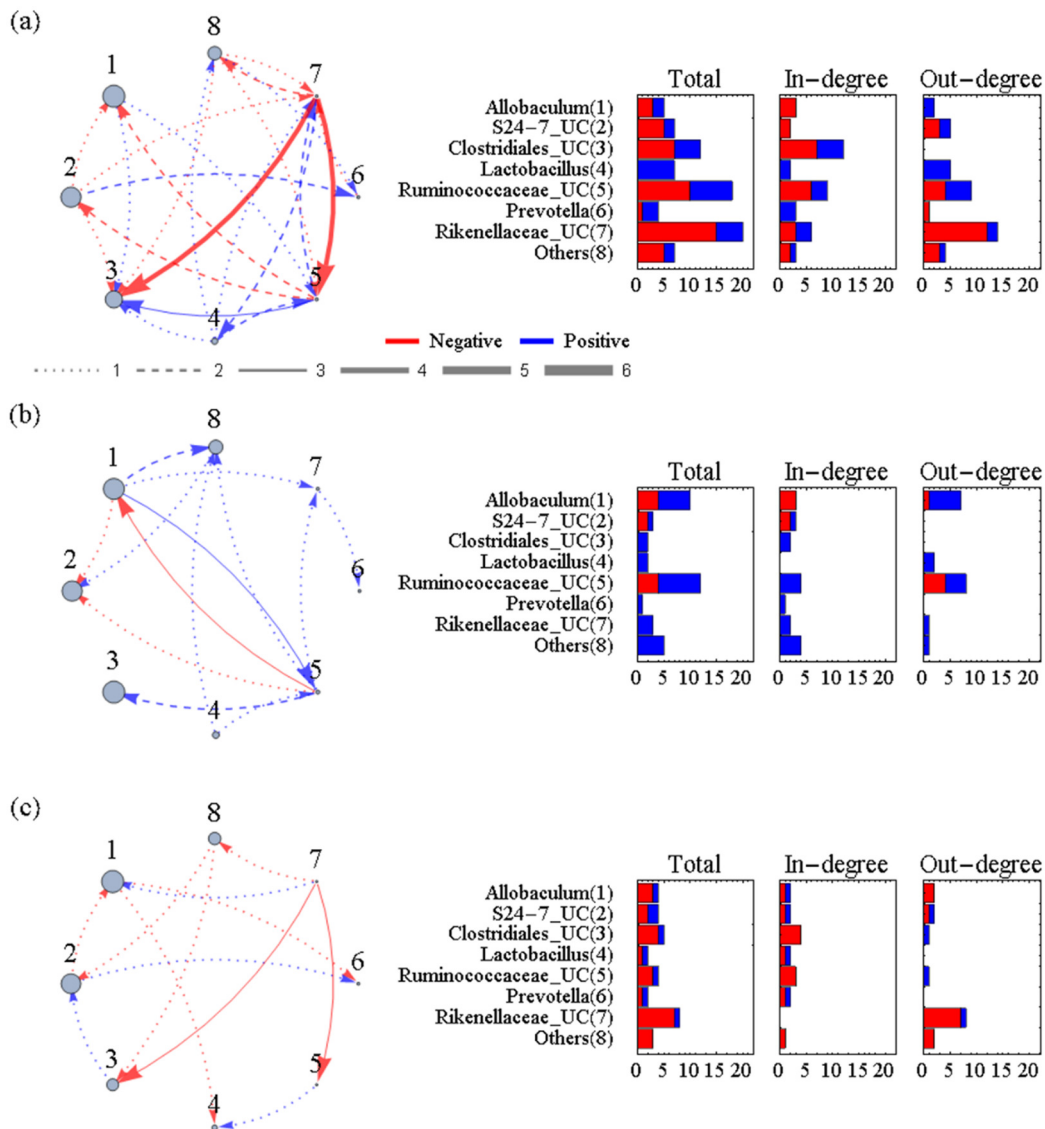

491

492 Figure 6. Union of the inter-specific interaction networks of six mice inferred by data  
 493 points at 4-72 weeks of age (a), 4-40 weeks of age and 36-72 weeks of age (c). The size of  
 494 the nodes indicates the relative abundance averaged over six mice. UC stands for  
 495 “unclassified” which means that the OTU was not classified into a known genus.

496

497

## 498 Discussion

499 We developed the sparse S-map method (SSM), an equation-free method used for  
 500 inferring ecological interaction networks from a multivariate ecological time-series  
 501 (Fig.1). Using simulated multispecies population dynamics, we compared the  
 502 performance of the SSM to a comparable equation-based method (LIMITS), to highlight  
 503 the differences between equation-free and equation-based methods when applied to

504 complex microbial dynamics (Fig. 2,3,4 and 5). We show that either an increase in  
505 dataset size or a decrease in observational error improved the accuracy of SSM (Fig. 4  
506 and 5). On the other hand, the accuracy of LIMITS was almost unchanged for both  
507 cases and equivalent to the SSM at best. Hence, the SSM outperformed LIMITS when  
508 datasets were large or the magnitudes of observational errors were small. The results  
509 were robust to the magnitudes of process noise and functional forms of inter-specific  
510 interactions that we tested. These results suggest that the SSM is able to extract more  
511 information from time-series data than LIMITS. This is partly due to the equation-free  
512 property of the SSM that allows inclusion of detailed descriptions of species  
513 relationships into the network inference. However, the SSM had better performance  
514 than LIMITS even for a Holling type I functional response that has no explicit non-  
515 linearity in its functional form (see supplementary information). In this case, the  
516 advantage of the SSM would be explained by its feasibility for the non-equilibrium  
517 population dynamics. It is worth discussing how well our approach scaled up to  
518 communities with a larger number of species. In principle, applicability of our method  
519 is not limited by the number of species. However, the application to a community with  
520 a large number of species would require many data points to cover its possible states.  
521 Our results suggest that shortage in dataset size reduces sensitivity rather than  
522 specificity (Fig. S3-6). Hence, the model will be able to identify some actual interactions  
523 even if the number of species is very large compared to the available dataset size.

524  
525 We applied the SSM to a time-series of gut-microbiota taken from the faeces of six  
526 mice. Our results are summarized as follows (Fig. S7): an unclassified  
527 Ruminococcaceae commonly affected other species from young to middle age, whereas  
528 Rikenellaceae commonly affected other species from middle to old age. Moreover, the  
529 Rikenellaceae itself had a negative effect on the Ruminococcaceae from middle to old  
530 age. An unclassified Clostridiales was affected by both groups throughout young to old  
531 age, while *Allobaculum* was a major counterpart of the Ruminococcaceae from young to  
532 middle age. The above mentioned relationship was still found in the network inferred  
533 by LIMITS, although it was obscured by other interactions (Fig. S8). These  
534 observations reflect the backdrop of lifelong dynamics of gut microbiota. For example,  
535 Rikenellaceae is reported as a common group in middle- to old-aged mice (Langille et  
536 al. 2014). Hence, although the unclassified Rikenellaceae was not a dominant group, as  
537 a member of this family, it makes sense that it actively interacts with other species in  
538 the latter half of the life-stage. Moreover, it is interesting to mention that a high-fat  
539 diet decreases the proportion of Ruminococcaceae and increases that of Rikenellaceae

540 (Daniel et al. 2014). The authors explained this based on the role of Ruminococcaceae  
541 as a major user of plant polysaccharides. Hence, our results might represent the age  
542 related shift in microbial interactions, and possibly its function, relative to nutrient  
543 metabolism. It is unclear whether differences in the interaction networks among mice  
544 were due to the nature of microbial interaction in the mouse gut microbiota, or simply  
545 due to data limitations. The universality of the interaction networks of mouse gut  
546 microbiota (Bashan et al. 2016) and the inherent dynamics must be answered in future  
547 studies. Recently, Odamaki et al. (2016) showed the age related compositional shifts in  
548 human gut microbiota. We anticipate that applying SSM to human subjects in different  
549 age groups will offer deeper insights into how the human gut microbiota is shaped  
550 through its lifelong developmental processes. For example, these analyses could reveal  
551 shifts in relationships between essential functional groups as well as their  
552 relationships to the development and ageing of physiological and immunological  
553 functions of our body.

554

555 While we used only difference of functional responses to control the nonlinearity of  
556 species relationships (see supplementary information), a variety of processes will be  
557 the source of non-linear species relationships in empirical microbial communities. The  
558 complex interdependency of metabolism (Baran et al. 2015), variety in strategies for  
559 inter specific competition (Hibbing et al. 2010; Ghoul and Mitri 2016), intercellular  
560 signaling such as quorum sensing (Atkinson and Williams 2009), formation of multi-  
561 species complexes known as biofilms (Stoodley et al. 2002), and evolutionary processes  
562 running concurrently to ecological processes (Gomez et al. 2016; Toju et al. 2017) might  
563 all contribute to the mechanistic basis. The relative performance of the SSM to LIMITS  
564 will depend on the ubiquity and strength of these processes. In this case, large non-  
565 linearity indices characterized the dynamics of mouse gut-microbiota (Fig. S9),  
566 indicating the effects of nonlinear relationships. Together with the performance of the  
567 SSM shown here, the need of equation-free modelling approaches for the analysis of  
568 microbial dynamics is demonstrated.

569

570 In the near future, advances in metagenomic technology will further reduce the cost to  
571 collect time-series data and its output will be much more accurate and precise. One  
572 important question to ask is whether this will allow the replacement of equation-free  
573 approaches with equation-based approaches that utilize advanced modelling  
574 techniques (e.g., Brunton et al. 2016). There are two reasons why this seems  
575 improbable. First, the complex nature of microbial interactions we have described, even

576 with such data, still present difficult challenges in formulating all the present  
577 relationships into mathematical formulations (Hartig and Dormann 2013; Perretti et  
578 al. 2013a, b; De Angelis and Yurek 2015). Moreover, time-dependency of species  
579 relationships also made it difficult to describe dynamics by a simple mathematical  
580 formulation even with longer and more precise time series. Second, a theoretical study  
581 proved that finding a precise dynamical equation for a time-series is, in general,  
582 computationally intractable even with any amount/quality of data (Cubitt et al. 2012).  
583 Conversely, these data advances would simply benefit our approach by promoting its  
584 ability to find links between species. Thus, the future development of metagenome  
585 technologies would reinforce both the applicability and reliability of equation-free  
586 approaches and help improve our mechanistic understanding of microbial communities.  
587 We agree with DeAngelis and Yurek (2015), who stressed the value of equation-free  
588 modeling approaches for the analysis of complex dynamical systems.

589

#### 590 **Data accessibility**

591 The mouse gut microbiome data is available in the DDBJ database  
592 (<http://getentry.ddbj.nig.ac.jp/>) under accession number DRA004786. We used  
593 Mathematica 10.2 to implement the SSM and LIMITS, generate simulation data,  
594 process mouse gut microbiome data and to perform the analysis. Computer codes  
595 (Mathematica notebook files) are available as online supporting information.

596

597

#### 598 **References**

- 599 1. Atkinson, S. & Williams, P. (2009) Quorum sensing and social networking in the  
600 microbial world. *Journal of the Royal Society Interface*, rsif20090203.
- 601 2. Baran, R., Brodie, E.L., Mayberry-Lewis, J., Hummel, E., da Rocha, U.N.,  
602 Chakraborty, R., Bowen, B.P., Karaoz, U., Cadillo-Quiroz, H., Garcia-Pichel, F. &  
603 Northen, T.R. (2015) Exometabolite niche partitioning among sympatric soil  
604 bacteria. *Nature Communications*, 6, 8289.
- 605 3. Bashan, A., Gibson, T.E., Friedman, J., Carey, V.J., Weiss, S.T., Hohmann, E.L. &  
606 Liu, Y.Y. (2016) Universality of human microbial dynamics. *Nature*, 534, 259-262.
- 607 4. Berry, D. & Widder, S. (2014) Deciphering microbial interactions and detecting  
608 keystone species with co-occurrence networks. *Frontiers in Microbiology*, 5, 219.
- 609 5. Blouin, M., Karimi, B., Mathieu, J. & Lerch, T.Z. (2015) Levels and limits in artificial  
610 selection of communities. *Ecology Letters*, 18, 1040-1048.
- 611 6. Borody, T.J. & Khoruts, A. (2012) Fecal microbiota transplantation and emerging



- 612 applications. *Nature Reviews Gastroenterology and Hepatology*, 9, 88-96.
- 613 7. Brunton, S.L., Proctor, J.L. & Kutz, J.N. (2016). Discovering governing equations  
614 from data by sparse identification of nonlinear dynamical systems. *Proceedings of*  
615 *the National Academy of Sciences*, 113, 3932-3937.
- 616 8. Bucci, V., Tzen, B., Li, N., Simmons, M., Tanoue, T., Bogart, E., Deng, L., Yeliseyev,  
617 V., Delaney, M. L., Liu, Q., Olle, B., Stein, R.R., Honda, K., Bry, L. & Gerber, G.K.  
618 (2016) MDSINE: Microbial Dynamical Systems INference Engine for microbiome  
619 time-series analyses. *Genome biology*, 17, 1.
- 620 9. Bucci, V. & Xavier, J.B. (2014) Towards predictive models of the human gut  
621 microbiome. *Journal of Molecular Biology*, 426, 3907-3916.
- 622 10. Caporaso, J. G., Lauber, C. L., Costello, E. K., Berg-Lyons, D., Gonzalez, A.,  
623 Stombaugh, J., Knights, D., Gajer, P., Ravel, J., Fierer, N., Gordon, J.I. & Knight, R.  
624 (2011) Moving pictures of the human microbiome. *Genome Biology*, 12, 1.
- 625 11. Chaparro, J.M., Sheflin, A.M., Manter, D.K. & Vivanco, J.M. (2012) Manipulating  
626 the soil microbiome to increase soil health and plant fertility. *Biology and Fertility*  
627 *of Soils*, 48, 489-499.
- 628 12. Coyte, K.Z., Schluter, J. & Foster, K.R. (2015) The ecology of the microbiome:  
629 networks, competition, and stability. *Science*, 350, 663-666.
- 630 13. Cubitt, T.S., Eisert, J. & Wolf, M.M. (2012) Extracting dynamical equations from  
631 experimental data is NP hard. *Physical Review Letters*, 108, 120503.
- 632 14. Daniel, H., Moghaddas Gholami, A., Berry, D., Desmarchelier, C., Hahne, H., Loh,  
633 G., Mondot, S., Lepage, P., Rothballer, M., Walker, A., Böhm, C., Wenning, M.,  
634 Wagner, M., Blaut, M., Schmitt-Kopplin, P., Kuster, B., Haller, D. & Clavel, T. (2014)  
635 High-fat diet alters gut microbiota physiology in mice. *The ISME journal*, 8, 295-308.
- 636 15. DeAngelis, D.L. & Yurek, S. (2015) Equation-free modeling unravels the behavior of  
637 complex ecological systems. *Proceedings of the National Academy of Sciences*, 112,  
638 3856-3857.
- 639 16. Dethlefsen, L. & Relman, D. A. (2011) Incomplete recovery and individualized  
640 responses of the human distal gut microbiota to repeated antibiotic perturbation.  
641 *Proceedings of the National Academy of Sciences*, 108, 4554-4561.
- 642 17. Deyle, E.R., Fogarty, M., Hsieh, C.H., Kaufman, L., MacCall, A.D., Munch, S.B.,  
643 Perrettia, C.T., Ye, H. & Sugihara, G. (2013) Predicting climate effects on Pacific  
644 sardine. *Proceedings of the National Academy of Sciences*, 110, 6430-6435.
- 645 18. Deyle, E.R., May, R.M., Munch, S.B. & Sugihara, G. (2016) Tracking and forecasting  
646 ecosystem interactions in real time. *Proceedings of the Royal Society of London B*  
647 *Biological Sciences*, 283, 20152258.



- 648 19. Dixon, P.A., Milicich, M.J. & Sugihara, G. (1999) Episodic fluctuations in larval  
649 supply. *Science*, 283, 1528-1530.
- 650 20. Ellner, S.P., Seifu, Y. & Smith, R.H. (2002) Fitting population dynamic models to  
651 time-series data by gradient matching. *Ecology*, 83, 2256-2270.
- 652 21. Faust, K., Lahti, L., Gonze, D., de Vos, W.M. & Raes, J. (2015) Metagenomics meets  
653 time series analysis: unraveling microbial community dynamics. *Current Opinion  
654 in Microbiology*, 25, 56-66.
- 655 22. Faust, K. & Raes, J. (2012) Microbial interactions: from networks to models. *Nature  
656 Reviews Microbiology*, 10, 538-550.
- 657 23. Fisher, C.K. & Mehta, P. (2014) Identifying keystone species in the human gut  
658 microbiome from metagenomic timeseries using sparse linear regression. *PLoS One*,  
659 9, e102451.
- 660 24. Friedman, J. & Alm, E.J. (2012) Inferring correlation networks from genomic survey  
661 data. *PLoS Computational Biology*, 8, e1002687.
- 662 25. Gerber, G. K. (2014) The dynamic microbiome. *FEBS letters*, 588, 4131-4139.
- 663 26. Ghoul, M. & Mitri, S. (2016) The Ecology and Evolution of Microbial Competition.  
664 *Trends in Microbiology*, 24, 833-845.
- 665 27. Gómez, P., Paterson, S., De Meester, L., Liu, X., Lenzi, L., Sharma, M.D., Kerensa,  
666 M. & Buckling, A. (2016) Local adaptation of a bacterium is as important as its  
667 presence in structuring a natural microbial community. *Nature Communications*, 7,  
668 12453.
- 669 28. Hartig, F. & Dormann, C.F. (2013) Does model-free forecasting really outperform the  
670 true model?. *Proceedings of the National Academy of Science*, 110, E3975-E3975.
- 671 29. Heederik, D. & von Mutius, E. (2012) Does diversity of environmental microbial  
672 exposure matter for the occurrence of allergy and asthma? *Journal of Allergy and  
673 Clinical Immunology*, 130, 44-50.
- 674 30. Hibbing, M.E., Fuqua, C., Parsek, M.R. & Peterson, S.B. (2010) Bacterial  
675 competition: surviving and thriving in the microbial jungle. *Nature Reviews  
676 Microbiology*, 8, 15-25.
- 677 31. Iranzo, M., Sainz-Pardo, I., Boluda, R., Sanchez, J. & Mormeneo, S. (2001) The use  
678 of microorganisms in environmental remediation. *Annals of Microbiology*, 51, 135-  
679 144.
- 680 32. Jiang, X., Hu, X., Xu, W., Li, G. & Wang, Y. (2013) Inference of microbial interactions  
681 from time series data using vector autoregression model. In *Bioinformatics and  
682 Biomedicine (BIBM), 2013 IEEE International Conference*, pp. 82-85. IEEE.
- 683 33. Jordán, F., Takács-Sánta, A. & Molnár, I. (1999) A reliability theoretical quest for

- 684 keystones. *Oikos* 86, 453-462.
- 685 34. Jordán, F. (2009) Keystone species and food webs. *Philosophical Transactions of the*  
686 *Royal Society of London B: Biological Sciences*, 364, 1733-1741.
- 687 35. Kamada, N., Chen, G.Y., Inohara, N. & Núñez, G. (2013) Control of pathogens and  
688 pathobionts by the gut microbiota. *Nature Immunology*, 14, 685-690.
- 689 36. Langille, M.G., Meehan, C.J., Koenig, J.E., Dhanani, A.S., Rose, R.A., Howlett, S.E.  
690 & Beiko, R.G. (2014) Microbial shifts in the aging mouse gut. *Microbiome*, 2, 50.
- 691 37. May, R.M. (1974) Stability and complexity in model ecosystems, 2nd edn. Princeton  
692 University Press, Princeton.
- 693 38. Morin, P.J. (2011) Community Ecology, 2nd edn. Wiley-Blackwell, Oxford.
- 694 39. Mueller, U.G. & Sachs, J.L. (2015) Engineering microbiomes to improve plant and  
695 animal health. *Trends in Microbiology*, 23, 606-617.
- 696 40. Odamaki, T., Kato, K., Sugahara, H., Hashikura, N., Takahashi, S., Xiao, J.Z., Abe,  
697 F. & Osawa, R. (2016) Age-related changes in gut microbiota composition from  
698 newborn to centenarian: a cross-sectional study. *BMC microbiology*, 16, 90.
- 699 41. Paine, R.T. (1969) A note on trophic complexity and community stability. *American*  
700 *Naturalist*, 103, 91-93.
- 701 42. Panke-Buisse, K., Poole, A.C., Goodrich, J.K., Ley, R.E. & Kao-Kniffin, J. (2015)  
702 Selection on soil microbiomes reveals reproducible impacts on plant function. *The*  
703 *ISME journal*, 9, 980-989.
- 704 43. Pepper, J. W. & Rosenfeld, S. (2012) The emerging medical ecology of the human gut  
705 microbiome. *Trends in Ecology & Evolution*, 27, 381-384.
- 706 44. Perretti, C.T., Munch, S.B. & Sugihara, G. (2013a) Model-free forecasting  
707 outperforms the correct mechanistic model for simulated and experimental data.  
708 *Proceedings of the National Academy of Science*, 110, 5253-5257.
- 709 45. Perretti, C.T., Munch, S.B. & Sugihara, G. (2013b). Reply to Hartig and Dormann:  
710 the true model myth. *Proceedings of the National Academy of Science*, 110, E3976-  
711 E3977.
- 712 46. Power, M.E., Tilman, D., Estes, J.A., Menge, B.A., Bond, W.J., Mills, L.S., Daily G.,  
713 Carlos, J., Lubchenco, J. & Paine, R.T. (1996) Challenges in the quest for keystones.  
714 *BioScience*, 46, 609-620.
- 715 47. Ravel, J., Brotman, R.M., Gajer, P., Ma, B., Nandy, M., Fadrosh, D.W. & Hickey, R.  
716 J. (2013) Daily temporal dynamics of vaginal microbiota before, during and after  
717 episodes of bacterial vaginosis. *Microbiome*, 1, 1.
- 718 48. Relman, D.A. (2012) The human microbiome: ecosystem resilience and health.  
719 *Nutrition Reviews*, 70 (suppl 1), S2-S9.

- 720 49. Sommer, F. & Bäckhed, F. (2013) The gut microbiota—masters of host development  
721 and physiology. *Nature Reviews Microbiology*, 11, 227-238.
- 722 50. Stoodley, P., Sauer, K., Davies, D.G. & Costerton, J.W. (2002) Biofilms as complex  
723 differentiated communities. *Annual Reviews in Microbiology*, 56, 187-209.
- 724 51. Sugihara, G., Allan, W., Sobel, D. & Allan, K. D. (1996) Nonlinear control of heart  
725 rate variability in human infants. *Proceedings of the National Academy of Sciences*,  
726 93, 2608-2613.
- 727 52. Sugihara, G. (1994) Nonlinear forecasting for the classification of natural time series.  
728 *Philosophical Transactions of the Royal Society of London A: Mathematical, Physical*  
729 *and Engineering Sciences*, 348, 477-495.
- 730 53. Swenson, W., Arendt, J., & Wilson, D.S. (2000) Artificial selection of microbial  
731 ecosystems for 3-chloroaniline biodegradation. *Environmental Microbiology*, 2, 564-  
732 571.
- 733 54. Toju, H., Yamamichi, M., Guimarães Jr, P.R., Olesen, J.M., Mougi, A., Yoshida, T. &  
734 Thompson, J.N. (2017) Species-rich networks and eco-evolutionary synthesis at the  
735 metacommunity level. *Nature Ecology & Evolution*, 1, 0024.
- 736 55. Toju, H., Yamamoto, S., Tanabe, A.S., Hayakawa, T. & Ishii, H.S. (2016) Network  
737 modules and hubs in plant-root fungal biomes. *Journal of the Royal Society Interface*,  
738 13, 20151097.
- 739 56. Tremaroli, V. & Bäckhed, F. (2012) Functional interactions between the gut  
740 microbiota and host metabolism. *Nature*, 489, 242-249.
- 741 57. Tylianakis, J.M., Laliberté, E., Nielsen, A. & Bascompte, J. (2010) Conservation of  
742 species interaction networks. *Biological Conservation*, 143, 2270-2279.
- 743 58. Vacher, C., Tamaddoni-Nezhad, A., Kamenova, S., Peyrard, N., Moalic, Y., Sabbadin,  
744 R., Schwaller, L., Chiquet, J., Smith, M.A., Vallance, J., Fievet, V., Jakuschkin, B. &  
745 Bohan, D.A. (2016) Chapter One: learning ecological networks from next-generation  
746 sequencing data. *Advances in Ecological Research*, 54, 1-39.
- 747 59. Ye, H., Beamish, R.J., Glaser, S.M., Grant, S.C., Hsieh, C.H., Richards, L.J., Schnute,  
748 J.T., Sugihara, G. (2015) Equation-free mechanistic ecosystem forecasting using  
749 empirical dynamic modeling. *Proceedings of the National Academy of Sciences*, 112,  
750 E1569-E1576.
- 751 60. Ye, H. & Sugihara, G. (2016) Information leverage in interconnected ecosystems:  
752 Overcoming the curse of dimensionality. *Science*, 353, 922-925.
- 753

## 754 **Supplementary information**

### 755 *Functional responses*

756 Holling Type I functional response is based on the assumption that the handling time  
757 required for interaction is negligible, thus  $F_i(x_j)$  linearly increase with  $x_j$ . On the  
758 other hand, type II functional response includes the handling time for interaction and  
759 is characterized by a saturation of  $F_i(x_j)$  when  $x_j$  increases. Type III functional  
760 response considers, as well as the effect of the handling time, a mechanism that  
761 suppresses increase of  $F_i(x_j)$  when  $j$  is rare. For example, it may be applicable when a  
762 species changes interaction mechanism depending on the relative abundance of other  
763 species. Actually, type II functional response is a special case where  $\gamma = 1$  in  $F_j =$   
764  $c_{ij}x_j^\gamma / (\beta K^\gamma + x_j^\gamma)$  and type III response includes all the cases where  $\gamma > 1$ . Hence,  $\gamma$  is a  
765 parameter that controls the nonlinear dependency of  $F_i$  on  $x_j$ . It is worth noting that  
766 in the type II response,  $\beta$  also controls the strength of non-linearity because  $F_j/x_j =$   
767  $c_{ij}/(\beta K + x_j)$  is close to  $c_{ij}/\beta K$  if  $\beta K$  is larger than  $x_j$ . On the other hand, type I  
768 functional response has no explicit nonlinearity. Hence, in terms of the degree of  
769 nonlinearity implemented in the functional form, type III response is the largest  
770 followed by type II and type I responses.

771

### 772 *Data generation*

773 Based on eq. (3), we generated ground truth data by numerically solving,

$$774 \log x_i(t + \Delta t) = \log x_i(t) + \{G(x_i) + \sum_{j=1}^N F_i(x_j)\} \Delta t + \eta_i(t).$$

775 (4)

776 We generated the initial state as  $\log x(0) = \{\log x_i(0)\}_{i=1}^N$  where  $\log x_i(0)$  is a random  
777 value drawn from a uniform distribution (5,9). The interaction matrix  $C$  is generated  
778 so that it has  $M$  non-zero off-diagonal elements, where value of the non-zero elements  
779 is assigned from a uniform distribution  $(-1, -0.05)$  or  $(0.05, 1)$  randomly. Here, we set  
780  $\Delta t = 0.1$ ,  $N = 7$  and  $M = 20$ . The diagonal elements of  $C$  is set to  $-0.5$ . With this initial  
781 state and interaction matrix, we numerically solved eq.(4) up to 5000 steps and took  
782 the latter 1000, 500 or 250 steps. The numerical simulation was discarded if the  
783 abundance of at least one species fell below one; otherwise the result was sampled  
784 every 10 steps to make a time-series with 100, 50 or 25 data points.

785

786 Other parameter values were as follows. We set  $r = 1$  so that the scale of dynamics  
787 was relevant to the simulation of microbial dynamics observed as the time-series of  
788 100, 50 and 25 data points mentioned above.  $K$  was set to  $10^4$  considering the  
789 standard size of a metagenomic read count. For, interspecific interactions, we set  $a_1 =$

790 7.5,  $a_2 = 2.7$ ,  $a_3 = 2$  and  $\beta = 0.1$ .

791

792 To prepare non-equilibrium time-series data, we accepted only a time-series whose  
 793 minimum value of  $\theta$  calculated for all species was larger than 1. In this pre-  
 794 evaluation, we calculate  $\theta$  by using all species as explanatory variables

795

796 *Five species coupled food chain model*

797 The equations of five species coupled food chain model are,

$$798 \quad \frac{dP_i}{dt} = \frac{v_i \lambda_i P_i C_i}{C_i + C_i^*} - v_i P_i + \epsilon P_i, (i = 1, 2)$$

$$799 \quad \frac{dC_i}{dt} = \frac{\mu_i \kappa_i C_i R}{R + R^*} - \frac{v_i \lambda_i P_i C_i}{C_i + C_i^*} - \mu_i C_i + \epsilon C_i, (i = 1, 2)$$

$$800 \quad \frac{dR}{dt} = R \left( 1 - \frac{R}{K} \right) - \sum_{i=1,2} \frac{\mu_i \kappa_i C_i R}{R + R^*} + \epsilon R,$$

801 where  $P_1$  and  $P_2$  are predator abundances,  $C_1$  and  $C_2$  are consumer abundances, and  
 802  $R$  is the shared resource abundance. Parameter values were set as follows:  $v_1 = 0.1$ ,  
 803  $v_2 = 0.07$ ,  $\lambda_1 = 3.2$ ,  $\lambda_2 = 2.9$ ,  $C_1^* = 0.5$ ,  $C_2^* = 0.5$ ,  $\mu_1 = 0.15$ ,  $\mu_2 = 0.15$ ,  $\kappa_1 = 2.5$ ,  $\kappa_2 =$   
 804  $2.0$ ,  $R^* = 0.3$ ,  $k = 1.2$ . After the transformation as in eq. (1) to (4), we numerically  
 805 solved the equations with step size  $\Delta t = 0.1$  upto 5,000 steps and took the latter 1000,  
 806 500, 250 or 120 steps. The result was sampled every 10 steps to make a time-series  
 807 with 100, 50, 25 or 12 data points.

808

809

810 *Supplementary figures*

811

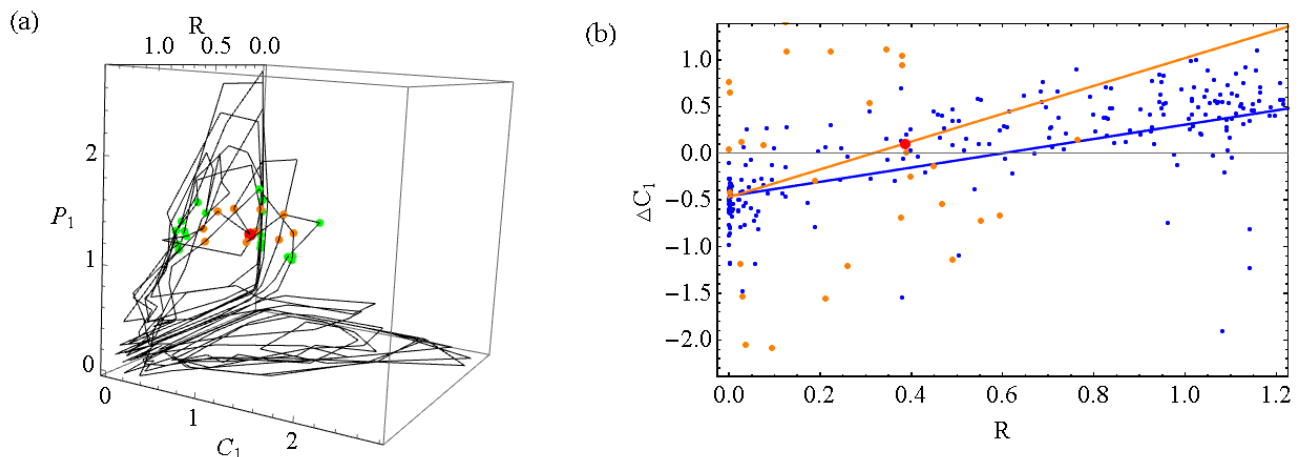

812

813 Figure S1. A schematic description of the SSM (S-map). (a) top 10 closest points

814 (orange) and top 11 to 20 closest points (green) of a target state (red) are plotted in a  
 815 three dimensional space. (b) regression lines in a two dimensional space ( $R, \Delta C_1$ ) by S-  
 816 map using  $R$  and  $C_1$  as explanatory variables and  $\Delta C_1 = \log C_1(t + 1) - \log C_1(t)$  as an  
 817 response variable is shown for  $\theta = 0$  (blue) and  $\theta = 1$  (orange). Here, top 30 closest  
 818 points of a target state (red) is also indicated by orange.  
 819  
 820

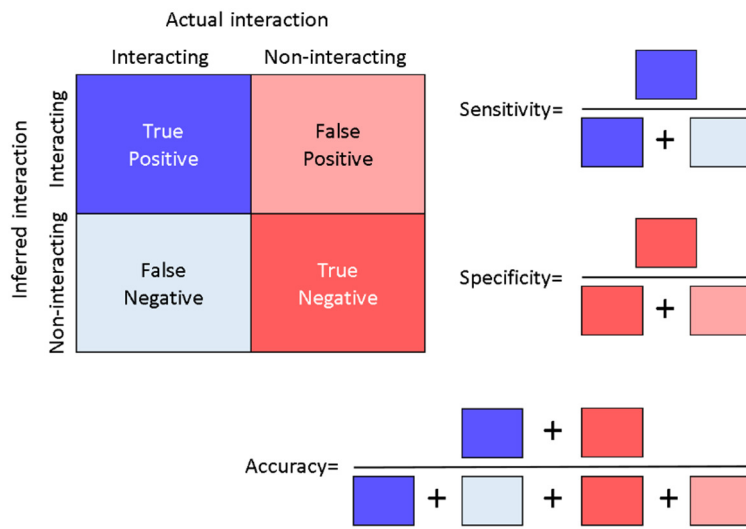

821  
 822 Figure S2. Binary criteria used for evaluation.

823  
 824

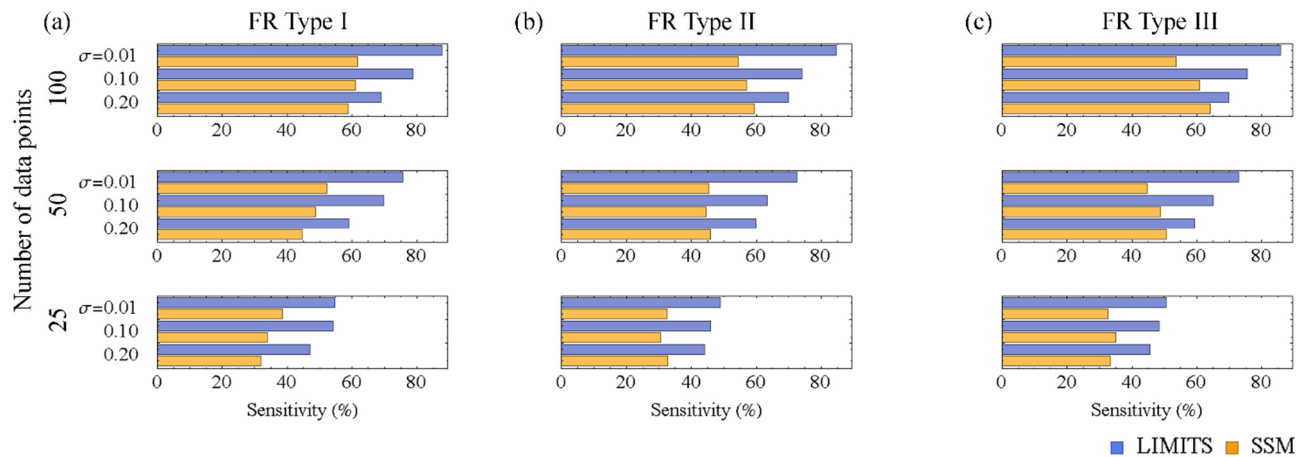

825  
 826 Figure S3. Sensitivity of the SSM and LIMITS for the inter-specific interactions of  
 827 simulated ecological dynamics with Holling type I (a), II (b) and III (c) functional  
 828 responses calculated by assembling 100 different network inference results (calculated  
 829 from 100 different time-series with 100, 50 and 25 dataset points generated from a



830 seven species GLV model with random species interactions and different magnitudes of  
 831 process noise).  
 832

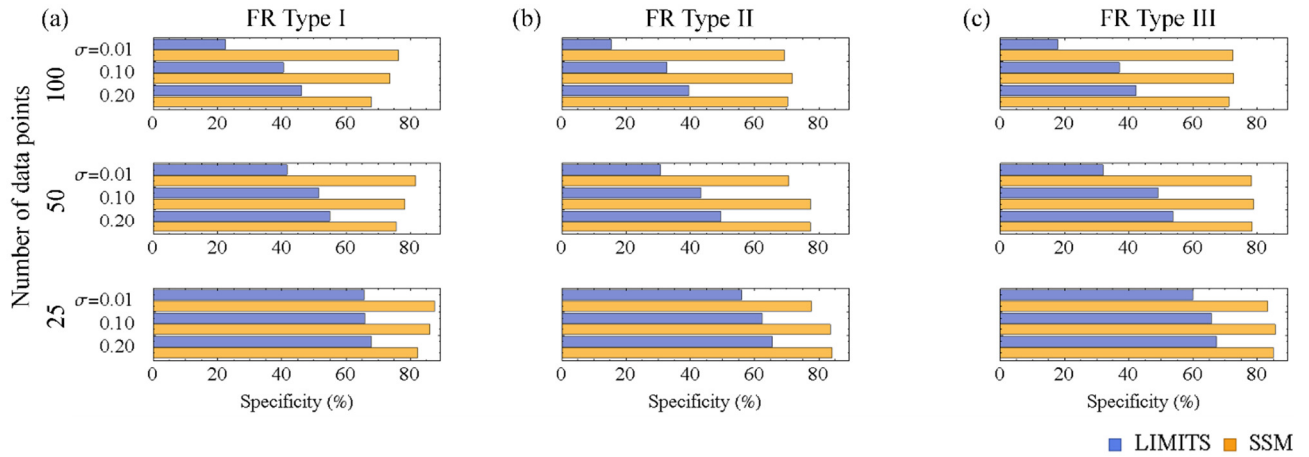

833  
 834 Figure S4. Specificity of the SSM and LIMITS for the inter-specific interactions of  
 835 simulated ecological dynamics with Holling type I (a), II (b) and III (c) functional  
 836 responses calculated by assembling 100 different network inference results for  
 837 different magnitudes of process noise and dataset size (calculated from 100 different  
 838 time-series with 100, 50 and 25 dataset points generated from a seven species GLV  
 839 model with random species interactions and different magnitudes of process noise).  
 840  
 841

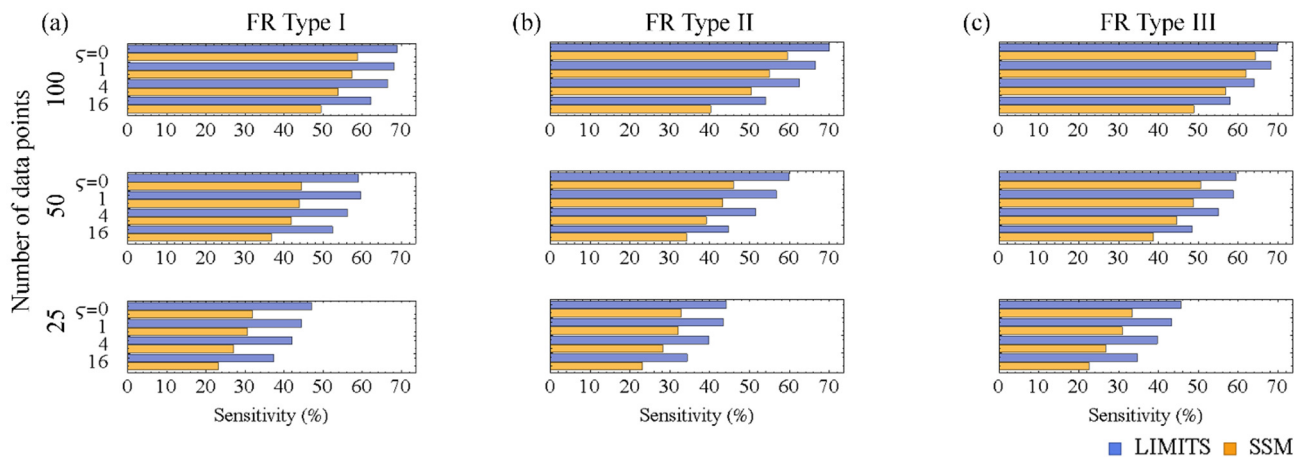

842  
 843 Figure S5. Sensitivity of the SSM and LIMITS for the inter-specific interactions of  
 844 simulated ecological dynamics with Holling type I (a), II (b) and III (c) functional  
 845 responses calculated by assembling 100 different network inference results (calculated  
 846 from 100 different time-series with 100, 50 and 25 dataset points generated from a  
 847 seven species GLV model with random species interactions perturbed by different



848 magnitudes of observational errors).

849

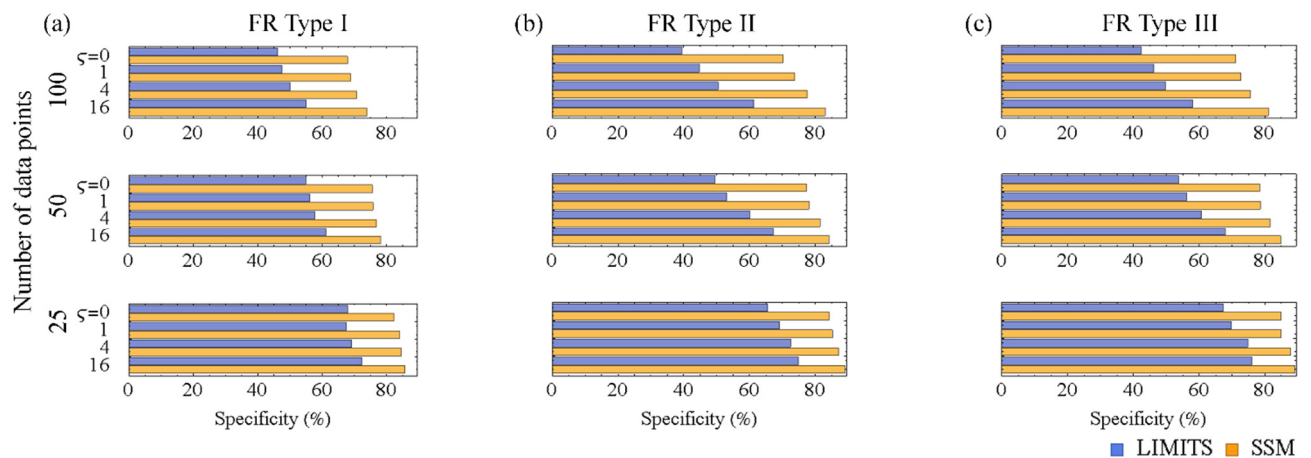

850

851 Figure S6. Sensitivity of the SSM and LIMITS for the inter-specific interactions of  
 852 simulated ecological dynamics with Holling type I (a), II (b) and III (c) functional  
 853 responses calculated by assembling 100 different network inference results (calculated  
 854 from 100 different time-series with 100, 50 and 25 dataset points generated from a  
 855 seven species GLV model with random species interactions perturbed by different  
 856 magnitudes of observational errors).

857

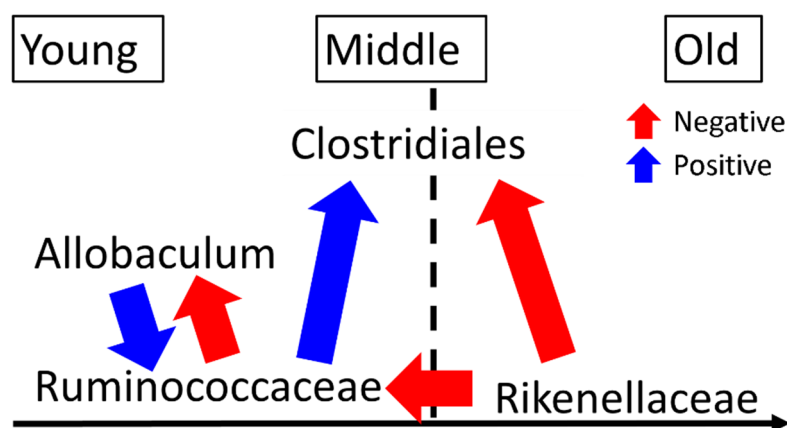

858

859 Figure S8. Schematic description of microbial interaction identified by the SSM.

860

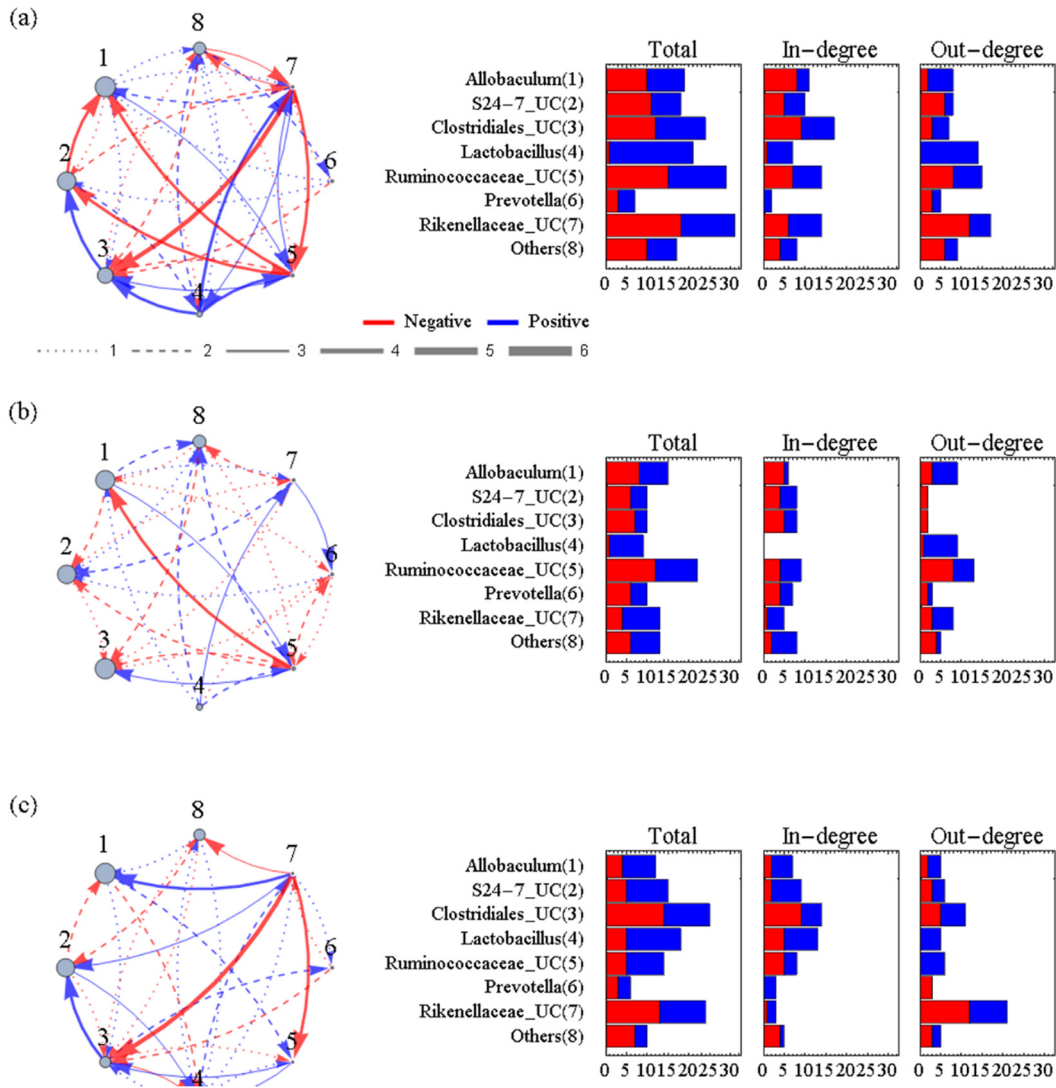

861

862 Figure S7. Union of the inter-specific interaction networks of six mice inferred at 4-40

863 weeks old (a-f). Positive and negative effects are indicated by blue and red arrows

864 respectively. The size of nodes indicates relative abundance. Inter-specific links are

865 excluded. UC stands for “unclassified” which means that the OTU was not classified

866 into a known genus.

867

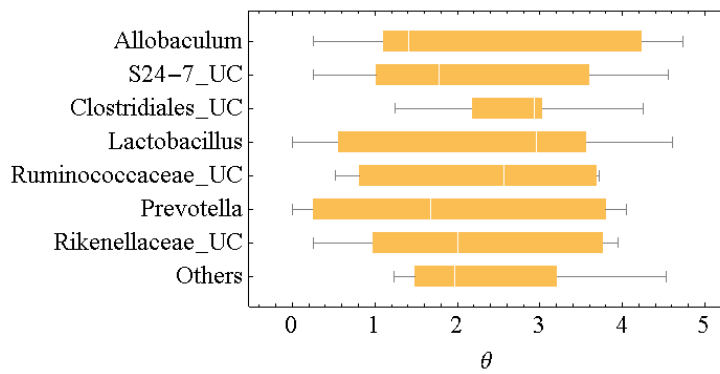

868

869 Figure S9. Box plot of the  $\theta$  of the seven most abundant groups in the mouse gut

870 microbiome for  $M_1$ .  $\theta$ s were not significantly different for other mice.

871

872
